# Supplementary material
Source: publisher site journal article supplement (https://cdn.jamanetwork.com/ama/content_public/journal/jamanetworkopen/938509/zoi200455supp1_prod.pdf)
Supplement: Supplementary file [file zoi200455supp1_prod.pdf]

## Supplementary Online Content

Lowry KP, Coley RY, Miglioretti DL, et al. Screening performance of digital breast tomosynthesis vs digital mammography in community practice by patient age, screening round, and breast density. *JAMA Netw Open*. 2020;3(7):e2011792.  
doi:10.1001/jamanetworkopen.2020.11792

**eTable.** Unadjusted Absolute Rates of Screening Recall, Biopsy Recommendation, and Cancer Detection

This supplementary material has been provided by the authors to give readers additional information about their work.

**eTable. Unadjusted Absolute Rates of Screening Recall, Biopsy Recommendation, and Cancer Detection**

Values are expressed as absolute rates per 1000 screening examinations (95% confidence intervals).

|            | Age, years | BI-RADS Density                  | Recall Rate       |                   | Biopsy Recommendation Rate |                      | Total Cancer Detection Rate |                      | Invasive Cancer Detection Rate |                     |
|------------|------------|----------------------------------|-------------------|-------------------|----------------------------|----------------------|-----------------------------|----------------------|--------------------------------|---------------------|
|            |            |                                  | DM                | DBT               | DM                         | DBT                  | DM                          | DBT                  | DM                             | DBT                 |
| Baseline   | 40-49      | All                              | 241<br>(237, 245) | 212<br>(204, 220) | 36.1<br>(34.3, 37.9)       | 41.8<br>(37.8, 45.8) | 3.1<br>(2.6, 3.7)           | 4.6<br>(3.2, 5.9)    | 2.2<br>(1.7, 2.6)              | 3.0<br>(1.9, 4.1)   |
|            | 50-59      |                                  | 241<br>(235, 248) | 202<br>(190, 215) | 40.8<br>(37.8, 43.8)       | 56.4<br>(49.1, 63.7) | 6.0<br>(4.9, 7.2)           | 8.1<br>(5.3, 11.0)   | 4.2<br>(3.3, 5.2)              | 6.6<br>(4.0, 9.1)   |
|            | 60-79      |                                  | 221<br>(214, 227) | 171<br>(158, 184) | 40.8<br>(37.6, 43.9)       | 48.4<br>(41.2, 55.6) | 10.8<br>(9.1, 12.4)         | 15.4<br>(11.3, 19.5) | 8.8<br>(7.3, 10.3)             | 13.4<br>(9.5, 17.2) |
| Subsequent | 40-49      | Almost entirely fat              | 58<br>(55, 62)    | 46<br>(38, 53)    | 7.5<br>(6.1, 8.8)          | 8.6<br>(5.3, 11.9)   | 0.5<br>(0.1, 0.8)           | 0.8<br>(0.0, 2.0)    | 0.4<br>(0.1, 0.7)              | 0.4<br>(0.0, 1.2)   |
|            |            | Scattered fibroglandular density | 104<br>(102, 106) | 77<br>(73, 80)    | 13.6<br>(12.9, 14.4)       | 11.2<br>(9.7, 12.6)  | 2.3<br>(2.0, 2.6)           | 2.0<br>(1.3, 2.6)    | 1.6<br>(1.4, 1.9)              | 1.6<br>(1.0, 2.2)   |
|            |            | Heterogeneously dense            | 133<br>(131, 135) | 113<br>(110, 116) | 17.8<br>(17.1, 18.5)       | 19.7<br>(18.1, 21.2) | 2.5<br>(2.2, 2.8)           | 3.1<br>(2.4, 3.7)    | 1.6<br>(1.4, 1.8)              | 2.2<br>(1.7, 2.8)   |
|            |            | Extremely dense                  | 113<br>(110, 116) | 117<br>(110, 123) | 19.0<br>(17.6, 20.3)       | 19.1<br>(16.4, 21.8) | 2.9<br>(2.4, 3.5)           | 2.8<br>(1.7, 3.9)    | 1.7<br>(1.3, 2.1)              | 1.5<br>(0.7, 2.2)   |
|            | 50-59      | Almost entirely fat              | 47<br>(45, 49)    | 37<br>(33, 41)    | 9.1<br>(8.2, 10.1)         | 7.4<br>(5.5, 9.3)    | 1.9<br>(1.5, 2.4)           | 1.3<br>(0.4, 2.2)    | 1.4<br>(1.0, 1.8)              | 0.8<br>(0.1, 1.5)   |
|            |            | Scattered fibroglandular density | 83<br>(81, 84)    | 65<br>(63, 68)    | 13.0<br>(12.4, 13.5)       | 12.8<br>(11.7, 13.8) | 3.3<br>(3.0, 3.6)           | 3.5<br>(2.8, 4.1)    | 2.4<br>(2.2, 2.7)              | 2.7<br>(2.2, 3.3)   |
|            |            | Heterogeneously dense            | 103<br>(102, 105) | 88<br>(86, 91)    | 16.9<br>(16.2, 17.6)       | 18.0<br>(16.7, 19.3) | 3.8<br>(3.5, 4.1)           | 5.3<br>(4.5, 6.1)    | 2.7<br>(2.4, 2.9)              | 4.1<br>(3.5, 4.8)   |
|            |            | Extremely dense                  | 92<br>(89, 95)    | 89<br>(82, 95)    | 19.3<br>(17.7, 20.8)       | 16.8<br>(13.9, 19.7) | 4.1<br>(3.4, 4.9)           | 4.7<br>(3.0, 6.3)    | 2.6<br>(2.0, 3.2)              | 2.9<br>(1.6, 4.1)   |
|            | 60-79      | Almost entirely fat              | 51<br>(50, 53)    | 37<br>(34, 40)    | 12.6<br>(11.7, 13.4)       | 9.6<br>(8.0, 11.2)   | 4.3<br>(3.8, 4.8)           | 3.5<br>(2.4, 4.6)    | 3.5<br>(3.0, 3.9)              | 3.1<br>(2.0, 4.1)   |
|            |            | Scattered fibroglandular density | 75<br>(74, 76)    | 58<br>(56, 60)    | 14.4<br>(13.9, 14.8)       | 13.0<br>(12.1, 13.9) | 5.5<br>(5.2, 5.8)           | 6.5<br>(5.8, 7.2)    | 4.3<br>(4.0, 4.6)              | 5.0<br>(4.4, 5.6)   |
|            |            | Heterogeneously dense            | 88<br>(87, 90)    | 73<br>(70, 75)    | 16.4<br>(15.7, 17.1)       | 17.5<br>(16.2, 18.8) | 6.1<br>(5.7, 6.5)           | 7.6<br>(6.6, 8.5)    | 4.6<br>(4.3, 5.0)              | 6.1<br>(5.3, 7.0)   |
|            |            | Extremely dense                  | 65<br>(61, 69)    | 59<br>(52, 66)    | 12.6<br>(10.9, 14.3)       | 12.2<br>(9.1, 15.4)  | 4.6<br>(3.5, 5.6)           | 4.8<br>(2.6, 7.0)    | 3.0<br>(2.1, 3.8)              | 4.0<br>(2.1, 6.0)   |

Abbreviations: DM=Digital mammography; DBT=Digital breast tomosynthesis; BI-RAD=Breast Imaging Reporting and Data System
